# Supplementary material
Source: MDPI journal article supplement (https://www.mdpi.com/1660-4601/12/3/3042)
Supplement: s1 [file s1]

## **South African Foundation Phase Teachers' Perceptions of ADHD at Private and Public Schools**

---

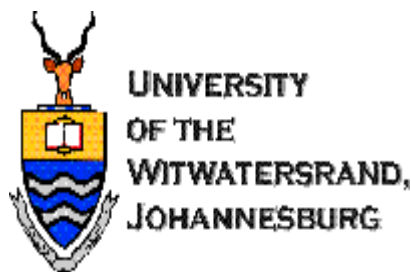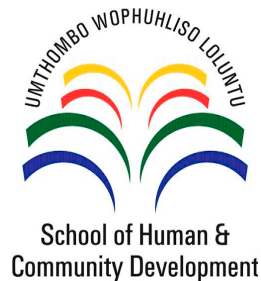

**Psychology**

**School of Human & Community Development**

---

Private Bag 3, Wits 2050, South Africa. Telephone: +27-11-717-4500/2/3/4. Fax: +27-11-717-4559

### **Foundation Phase Educators' Perceptions of Attention Deficit Hyperactivity Disorder at Private and Public Schools**

#### **Questionnaire**

Please answer the following questions by placing a tick in the appropriate box/column or by writing in the space provided.

#### **Section A: Demographic Data**

1. Gender:

|        |  |
|--------|--|
| Male   |  |
| Female |  |

2. Age Group:

|         |  |
|---------|--|
| 20–25   |  |
| 26–30   |  |
| 31–35   |  |
| 36–40   |  |
| 41–45   |  |
| 46–50   |  |
| Over 50 |  |

3. Where did you qualify?

Country:

Institution:

4. What degree/diploma did you study for?

5. When did you graduate?

6. Number of years teaching experience:

|             |  |
|-------------|--|
| 1–5 years   |  |
| 6–10 years  |  |
| 11–15 years |  |
| 15– > years |  |

7. Have you completed any postgraduate courses?

|     |  |
|-----|--|
| Yes |  |
| No  |  |

(If yes) Please elaborate.

8. Please specify the type of school at which you are currently teaching:

|                                                                                            |  |
|--------------------------------------------------------------------------------------------|--|
| Inner City School (A school that is found in Johannesburg City Central or Braamfontein)    |  |
| Urban School (A school that is found in the suburbs surrounding Johannesburg City Central) |  |
| Township School                                                                            |  |
| Other:                                                                                     |  |

9. Which grade are you currently teaching?

|         |  |
|---------|--|
| Grade 0 |  |
| Grade 1 |  |
| Grade 2 |  |
| Grade 3 |  |

10. How many learners are in your class?

|              |  |
|--------------|--|
| Less than 15 |  |
| 16–20        |  |
| 21–25        |  |
| 26–30        |  |
| 31–35        |  |
| 36–40        |  |
| 41–45        |  |
| 46–50        |  |
| More than 50 |  |

11. Please specify the number of learners who fall into the following race groups in your class:

|          |  |
|----------|--|
| Black    |  |
| White    |  |
| Indian   |  |
| Coloured |  |
| Other    |  |

12. The following resources are available at my school:

|                              |  |
|------------------------------|--|
| Educational psychologist     |  |
| Occupational therapist       |  |
| Speech and Hearing therapist |  |
| Clinical Psychologist        |  |
| Remedial therapist           |  |

13. Have you attended any courses with regards to ADHD?

|     |  |
|-----|--|
| Yes |  |
| No  |  |

**(If yes)** Please elaborate.

---



---



---



---

**Section B:**

14. Do you have learners who have been medically diagnosed as having ADHD in your class?

|     |  |
|-----|--|
| Yes |  |
| No  |  |

(If Yes) How many? \_\_\_\_\_

Specify the number of girls and boys:

|       |  |
|-------|--|
| Girls |  |
| Boys  |  |

What is their treatment plan?

|                        |  |
|------------------------|--|
| Ritalin                |  |
| Concerta               |  |
| Behaviour modification |  |
| Play Therapy           |  |
| Counselling            |  |
| Other                  |  |

Please specify. \_\_\_\_\_

Please specify which/all of these approaches to treatment are effective and why.

| Treatment plan         | Effective |    | Reason |
|------------------------|-----------|----|--------|
|                        | Yes       | No |        |
| Ritalin                |           |    | _____  |
| Concerta               |           |    | _____  |
| Behaviour Modification |           |    | _____  |
| Play Therapy           |           |    | _____  |
| Counselling            |           |    | _____  |
| Other                  |           |    | _____  |

15. Do you have learners who you suspect of having ADHD in your class?

|     |  |
|-----|--|
| Yes |  |
| No  |  |

(If yes) How many? \_\_\_\_\_

Specify the number of girls and boys:

|       |  |
|-------|--|
| Girls |  |
| Boys  |  |

16. What is your understanding of the term Attention Deficit Hyperactivity Disorder?

---



---



---



---

17. Children who have ADHD ...

| Statement                   | Strongly Agree | Agree | Neither Agree nor Disagree | Disagree | Strongly Disagree |
|-----------------------------|----------------|-------|----------------------------|----------|-------------------|
| Cannot sit still            |                |       |                            |          |                   |
| Daydream                    |                |       |                            |          |                   |
| Fight with their classmates |                |       |                            |          |                   |
| Do not complete work        |                |       |                            |          |                   |
| Cannot stay focused         |                |       |                            |          |                   |
| Do not listen               |                |       |                            |          |                   |
| Cannot start work           |                |       |                            |          |                   |
| Are easily distracted       |                |       |                            |          |                   |
| Are impulsive               |                |       |                            |          |                   |
| Are disruptive              |                |       |                            |          |                   |
| Talk constantly             |                |       |                            |          |                   |
| Are attention seeking       |                |       |                            |          |                   |
| Are fidgety                 |                |       |                            |          |                   |
| Cannot concentrate          |                |       |                            |          |                   |
| Are disobedient             |                |       |                            |          |                   |
| Are emotionally sensitive   |                |       |                            |          |                   |
| Cannot follow instructions  |                |       |                            |          |                   |
| Cannot delay gratification  |                |       |                            |          |                   |
| Are disorganized            |                |       |                            |          |                   |
| Are forgetful               |                |       |                            |          |                   |
| Are noisy                   |                |       |                            |          |                   |
| Shout out in class          |                |       |                            |          |                   |
| Other: _____                |                |       |                            |          |                   |

18. For a diagnosis of ADHD to be made ...

| Statement                                                                       | Strongly Agree | Agree | Neither Agree nor Disagree | Disagree | Strongly Disagree |
|---------------------------------------------------------------------------------|----------------|-------|----------------------------|----------|-------------------|
| A child must be inattentive and/or hyperactive/impulsive                        |                |       |                            |          |                   |
| The behaviour must have occurred before the age of seven years.                 |                |       |                            |          |                   |
| The behaviour must be present in more than one setting (e.g., school and home). |                |       |                            |          |                   |
| The behaviour must be present for more than six months.                         |                |       |                            |          |                   |

19. ADHD is caused by:

| Statement                                           | Strongly Agree | Agree | Neither Agree nor Disagree | Disagree | Strongly Disagree |
|-----------------------------------------------------|----------------|-------|----------------------------|----------|-------------------|
| Poor diet                                           |                |       |                            |          |                   |
| Brain dysfunction                                   |                |       |                            |          |                   |
| Depression                                          |                |       |                            |          |                   |
| Hereditary                                          |                |       |                            |          |                   |
| Lack of discipline in the home                      |                |       |                            |          |                   |
| Auditory processing difficulties                    |                |       |                            |          |                   |
| Visual processing difficulties                      |                |       |                            |          |                   |
| Insecurity                                          |                |       |                            |          |                   |
| Lack of boundaries                                  |                |       |                            |          |                   |
| Too much television                                 |                |       |                            |          |                   |
| Reading difficulties                                |                |       |                            |          |                   |
| Food additives, colourants and preservatives.       |                |       |                            |          |                   |
| Too much sugar                                      |                |       |                            |          |                   |
| Television games (including playstation, and x-box) |                |       |                            |          |                   |
| Lack of physical activity                           |                |       |                            |          |                   |
| Other:                                              |                |       |                            |          |                   |

20. In your opinion, a child suspected of suffering from ADHD should be assessed by a :

| Statement                | Strongly Agree | Agree | Neither Agree nor Disagree | Disagree | Strongly Disagree |
|--------------------------|----------------|-------|----------------------------|----------|-------------------|
| Neurologist              |                |       |                            |          |                   |
| Pediatrician             |                |       |                            |          |                   |
| Educational Psychologist |                |       |                            |          |                   |

|                              |  |  |  |  |  |
|------------------------------|--|--|--|--|--|
| Occupational Therapist       |  |  |  |  |  |
| Speech and Hearing therapist |  |  |  |  |  |
| General Practitioner         |  |  |  |  |  |
| Clinical Psychologist        |  |  |  |  |  |
| Other: _____                 |  |  |  |  |  |

21. When I think a child may be suffering from ADHD I:

| Statement                                                      | Strongly Agree | Agree | Neither Agree nor Disagree | Disagree | Strongly Disagree |
|----------------------------------------------------------------|----------------|-------|----------------------------|----------|-------------------|
| Ask the parents to have an assessment done                     |                |       |                            |          |                   |
| Move the child around the class                                |                |       |                            |          |                   |
| Ask the parents to have a physical examination done            |                |       |                            |          |                   |
| Ask the parents to give the child Ritalin                      |                |       |                            |          |                   |
| Put firm boundaries in place                                   |                |       |                            |          |                   |
| Discuss the child's diet with the parents                      |                |       |                            |          |                   |
| Put the child at a desk of their own                           |                |       |                            |          |                   |
| Try to limit distractions                                      |                |       |                            |          |                   |
| Put a behaviour modification plan in place (system of rewards) |                |       |                            |          |                   |
| Other: _____                                                   |                |       |                            |          |                   |

22. When referring to a specialist I expect the specialist to:

| Statement                                             | Strongly Agree | Agree | Neither Agree nor Disagree | Disagree | Strongly Disagree |
|-------------------------------------------------------|----------------|-------|----------------------------|----------|-------------------|
| Prescribe Ritalin                                     |                |       |                            |          |                   |
| Ask me to complete a Connors questionnaire            |                |       |                            |          |                   |
| Rule out physical causes of behaviour                 |                |       |                            |          |                   |
| Offer me support/advice on how to deal with the child |                |       |                            |          |                   |

Please elaborate if there is anything else you would expect the specialist to do.

---



---



---



---

23. Please feel free to add anything else with regards to ADHD in the space provided.

---

---

---

---

---

---

Thank you for your time and cooperation.

© 2015 by the authors; licensee MDPI, Basel, Switzerland. This article is an open access article distributed under the terms and conditions of the Creative Commons Attribution license (<http://creativecommons.org/licenses/by/4.0/>).
